# Supplementary material for: Flexible fluorinated graphite foils with high contents of the (C2F)n phase for slow neutron reflectors
Source: Royal Society of Chemistry journal article supplement (doi:10.1039/d4dt00794h), 2024-01-01
Supplement: d4dt00794h1.pdf [file d4dt00794h1.pdf]

Table S11

**Table S11.** Percentage of  $(C_2F)_n$  phase from  $^{13}C$  NMR data for FT<sub>F</sub>-Foil0.1 series

|              | F390-Foil0.1 | F410-Foil0.1 | F430-Foil0.1 | F460-Foil0.1 |
|--------------|--------------|--------------|--------------|--------------|
| % $(C_2F)_n$ | 75±2         | 77±2         | 76±2         | 69±2         |
| F/C*         | 0.56±0.01    | 0.55±0.01    | 0.56±0.01    | 0.59±0.01    |

\* F/C =  $1/(1+0.01*\%(C_2F)_n)$

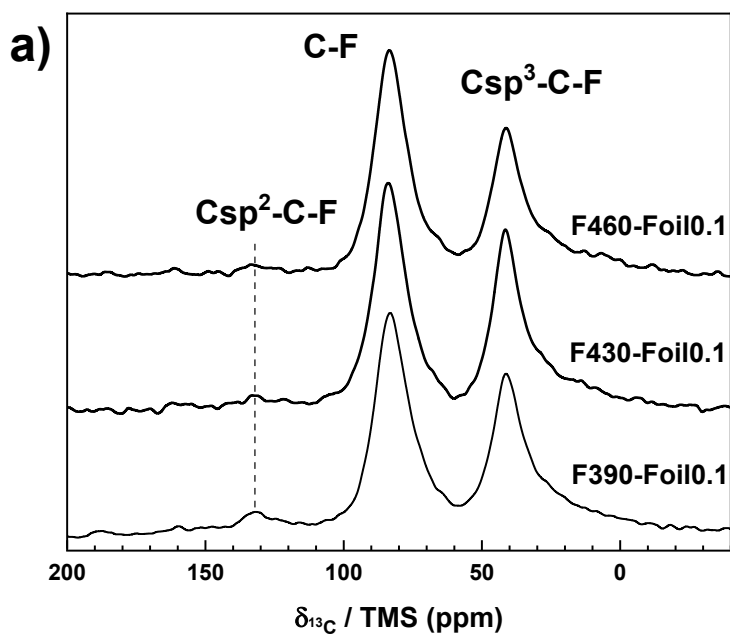

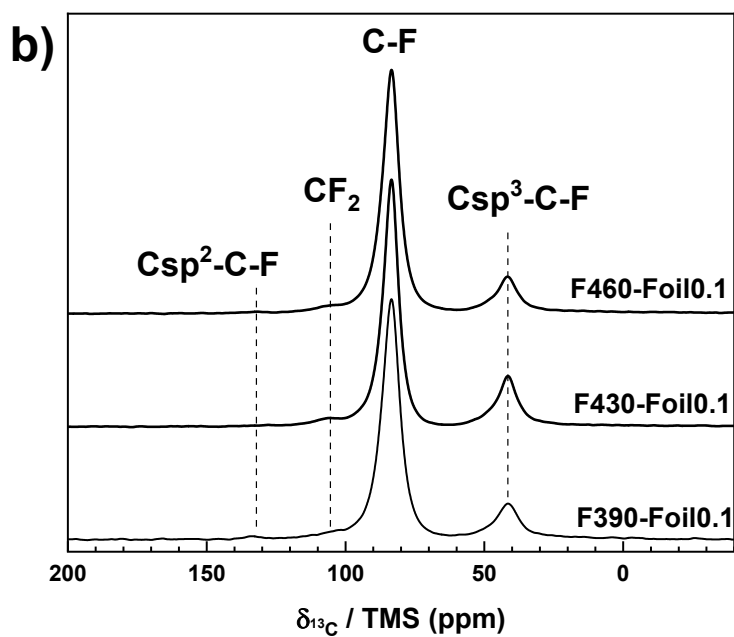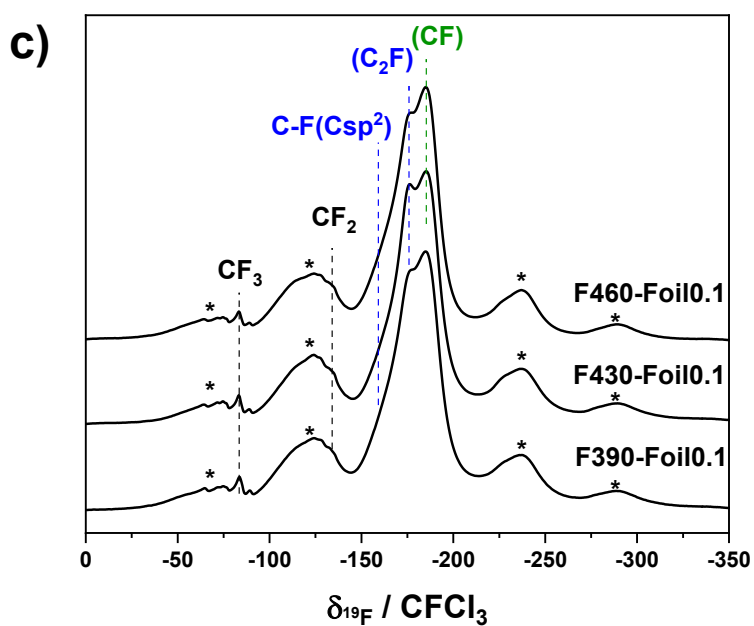

Figure S11. MAS NMR spectra of 0.1 mm foil on  $^{13}\text{C}$  (a),  $^{19}\text{F}$ - $^{13}\text{C}$  CP (b) and  $^{19}\text{F}$  nuclei (c). The spinning rates are 10, 10 and 14 kHz, respectively.
